# Supplementary material for: Bioprinting of 3D Adipose Tissue Models Using a GelMA-Bioink with Human Mature Adipocytes or Human Adipose-Derived Stem Cells
Source: MDPI journal article supplement (doi:10.3390/gels8100611), 2022-09-25
Supplement: s1 [file s1]

Table S1: semi-quantified values of cell viability

|                  | condition       | viable cells [%] | dead cells [%] | SD [%] |
|------------------|-----------------|------------------|----------------|--------|
| ASC in GelMA     | day 1 manual    | 90.1             | 9.9            | 3.2    |
|                  | day 1 additive  | 88.8             | 11.2           | 5.6    |
|                  | day 15 manual   | 93.2             | 6.8            | 4.2    |
|                  | day 15 additive | 93.6             | 6.4            | 4.0    |
| AC in GelMA      | day 1 manual    | 85.1             | 14.9           | 6.2    |
|                  | day 1 additive  | 84.0             | 16.0           | 7.6    |
|                  | day 8 manual    | 86.2             | 13.8           | 8.8    |
|                  | day 8 additive  | 87.8             | 12.2           | 10.2   |
| explanted lobule | day 1           | 88.0             | 12.0           | 2.6    |
|                  | day 8           | 87.3             | 12.7           | 7.9    |
